# Supplementary material
Source: MDPI journal article supplement (https://www.mdpi.com/1424-2818/14/2/135)
Supplement: s1 [file s1]

# SUPPLEMENTARY MATERIAL

**Table S1.** Time schedule of the 37 and 41 visits conducted during the breeding (March–November) and non breeding (November–March) season for prey remain collection at the 15 territories. N is the number of prey items identified and in parenthesis the number of visits per season in each territory.

| TERRITORY | Breeding   | Non-breeding | TERRITORY | Breeding   | Non-breeding |
|-----------|------------|--------------|-----------|------------|--------------|
| 1         | 2011/01/07 | 2018/02/10   | 8         | 2018/06/21 | 2018/01/15   |
|           | 2011/10/25 | 2018/12/11   |           | 2018/09/26 | 2018/01/30   |
|           | 2012/09/30 | 2019/11/29   |           | 2018/10/14 | 2018/12/23   |
|           | 2018/09/07 | 2019/12/02   |           | 2019/10/02 | 2019/03/04   |
|           | 2018/10/18 | 2019/12/27   |           |            | 2020/01/03   |
|           | 2019/06/22 | 2020/02/13   |           |            | 2020/02/27   |
|           | 2019/11/18 |              |           | N8         | 91 (4)       |
| N1        | 223 (7)    | 38 (6)       |           |            | 37 (6)       |
| 2         | 2018/10/19 | 2017/12/09   | 9         | 2019/10/02 | 2019/02/28   |
|           | 2019/06/24 | 2019/01/29   |           | 2019/10/24 | 2019/12/02   |
|           | 2019/11/21 | 2019/02/27   |           |            | 2019/12/16   |
|           | 2020/06/27 | 2019/12/21   |           | N9         | 71 (2)       |
|           |            | 2019/12/26   |           |            | 12 (3)       |
|           |            | 2020/01/09   |           |            | 2017/12/13   |
|           |            | 2020/02/22   |           |            | 2017/12/28   |
| 3         |            | 2020/12/08   | 10        |            | 2018/02/28   |
|           | N2         | 43 (4)       |           | N10        | 0 (0)        |
|           |            | 34 (8)       |           |            | 29 (3)       |
|           | 2018/10/17 | 2019/12/21   |           |            | 2018/09/17   |
|           | 2019/06/28 | 2020/01/24   |           |            | 2018/12/04   |
|           | 2019/11/23 | 2020/02/23   |           |            | 2019/02/09   |
|           |            |              |           |            | 2019/03/04   |
| N3        | 48 (3)     | 9 (3)        | 11        |            | 2020/01/12   |
| 4         | 2021/07/08 |              |           | N11        | 63 (3)       |
| N4        | 16 (1)     | 0 (0)        |           |            | 16 (4)       |
| 5         | 2020/07/05 |              |           |            | 2017/11/25   |
| N5        | 11 (1)     | 0 (0)        |           |            | 2017/12/24   |
|           | 2017/05/16 |              |           |            | 2018/07/22   |
|           | 2021/06/27 |              |           |            | 2019/02/10   |
| 6         | 2021/07/05 |              | 12        |            | 2018/10/11   |
|           | 2021/07/23 |              |           |            | 2020/01/19   |
| N6        | 12 (4)     | 0 (0)        |           |            | 2018/10/21   |
| 7         | 2019/06/20 |              |           |            | 2019/11/06   |
| N7        | 18 (1)     | 0 (0)        |           | N12        | 43 (5)       |
|           |            |              |           |            | 10 (3)       |
|           |            |              |           | 13         | 2019/06/28   |
|           |            |              | 13        | N13        | 4 (1)        |
|           |            |              |           |            | 0 (0)        |
|           |            |              |           |            | 2018/09/07   |
|           |            |              |           |            | 2020/01/25   |
|           |            |              |           |            | 2020/02/24   |
|           |            |              |           |            | 2020/03/21   |
|           |            |              |           | N14        | 8 (2)        |
|           |            |              |           |            | 5 (3)        |

**Table S2.** Percentage of prey categories across golden eagle territories in northern Greece with at least 10 items. P is prevalence across territories (number of territories where prey category was found / total number of territories); N is the number of items, Levins is the Levins diversity index, and AF is the average frequency across territories.

| Prey category       |          |                    | Territories |     |     |     |     |     |     |     |     |     |     |     | P    | N   | AF   |
|---------------------|----------|--------------------|-------------|-----|-----|-----|-----|-----|-----|-----|-----|-----|-----|-----|------|-----|------|
|                     |          |                    | 1           | 2   | 3   | 4   | 5   | 6   | 7   | 8   | 9   | 10  | 11  | 12  |      |     |      |
| Breeding season     | B-c      | Corvids            | 1.3         | 2.3 | 4.2 | 6.3 | 9.1 | 8.3 | 0   | 1.1 | 1.9 |     | 0   | 0   | 0.73 | 11  | 3.1  |
|                     | B_ro     | Raptors - Owls     | 0.4         | 0   | 0   | 0   | 0   | 0   | 0   | 1.1 | 0   |     | 0   | 0   | 0.18 | 2   | 0.1  |
|                     | B_tp     | Thrushes-Pigeons   | 0.9         | 12  | 0   | 0   | 0   | 0   | 0   | 1.1 | 0   |     | 4.8 | 4.7 | 0.45 | 13  | 2.1  |
|                     | B_w      | Waterbirds         | 1.3         | 2.3 | 0   | 0   | 0   | 0   | 0   | 0   | 0   |     | 1.6 | 9.3 | 0.36 | 9   | 1.3  |
|                     | B_o      | Other birds        | 3.6         | 7.0 | 4.2 | 0   | 0   | 0   | 0   | 1.1 | 1.9 |     | 1.6 | 4.7 | 0.64 | 18  | 2.2  |
|                     | BIRDS    |                    | 7.6         | 23  | 8.3 | 6.3 | 9.1 | 8.3 | 0.0 | 4.4 | 3.8 |     | 7.9 | 19  | 0.91 | 53  | 8.9  |
|                     | M_c      | Carnivores         | 3.1         | 4.7 | 8.3 | 19  | 0.0 | 8.3 | 0.0 | 6.6 | 1.9 |     | 1.6 | 0.0 | 0.73 | 25  | 4.8  |
|                     | M_gs     | Glirids - Sciurids | 2.7         | 0.0 | 13  | 0.0 | 9.1 | 0   | 0   | 0   | 0   |     | 0.0 | 2.3 | 0.36 | 14  | 2.4  |
|                     | M_ha     | Hares              | 0.4         | 2.3 | 2.1 | 6.3 | 9.1 | 0.0 | 5.6 | 0   | 1.9 |     | 0.0 | 2.3 | 0.73 | 8   | 2.7  |
|                     | M_he     | Hedgehogs          | 1.8         | 0.0 | 6.3 | 0   | 0   | 0   | 0   | 5.5 | 5.7 |     | 4.8 | 4.7 | 0.55 | 20  | 2.6  |
|                     | M_u      | Ungulates          | 2.7         | 0.0 | 2.1 | 0   | 0   | 0   | 0   | 0.0 | 5.7 |     | 0.0 | 2.3 | 0.36 | 11  | 1.2  |
|                     | M_o      | Mammals other      | 1.3         | 0.0 | 2.1 | 6.3 | 9.1 | 0.0 | 0.0 | 1.1 | 3.8 |     | 0.0 | 4.7 | 0.64 | 11  | 2.6  |
|                     | MAMMALS  |                    | 12          | 7   | 33  | 31  | 27  | 8   | 6   | 13  | 19  |     | 6   | 16  | 1    | 89  | 16.3 |
|                     | R_sl     | Snakes & Lizards   | 3.6         | 2.3 | 6.3 | 0   | 0   | 0   | 11  | 5.5 | 15  |     | 1.6 | 4.7 | 0.73 | 30  | 4.6  |
|                     | R_t      | Tortoises          | 77          | 67  | 52  | 63  | 64  | 83  | 83  | 77  | 62  |     | 84  | 60  | 1    | 449 | 70.3 |
|                     | REPTILES |                    | 80          | 70  | 58  | 63  | 64  | 83  | 94  | 82  | 77  |     | 86  | 65  | 1    | 479 | 74.8 |
| N                   |          |                    | 223         | 43  | 48  | 16  | 11  | 12  | 18  | 91  | 53  |     | 63  | 43  |      | 621 |      |
| Levins              |          |                    | 1.7         | 2.1 | 3.3 | 2.3 | 2.3 | 1.4 | 1.4 | 1.7 | 2.4 |     | 1.4 | 2.6 |      |     |      |
| Non-breeding season | B-c      | Corvids            | 5.3         | 2.9 |     |     |     |     |     | 2.7 | 8.3 | 6.9 | 0   | 0.0 | 0.71 | 7   | 3.7  |
|                     | B_ro     | Raptors & Owls     | 0.0         | 2.9 |     |     |     |     |     | 2.7 | 0.0 | 0.0 | 0   | 0.0 | 0.29 | 2   | 0.8  |
|                     | B_tp     | Thrushes -Pigeons  | 2.6         | 29  |     |     |     |     |     | 8.1 | 8.3 | 10  | 6.3 | 0.0 | 0.86 | 19  | 9.3  |
|                     | B_w      | Waterbirds         | 2.6         | 2.9 |     |     |     |     |     | 2.7 | 0.0 | 6.9 | 13  | 30  | 0.86 | 10  | 8.2  |
|                     | B_o      | Other Birds        | 7.9         | 15  |     |     |     |     |     | 5.4 | 0.0 | 6.9 | 19  | 10  | 0.86 | 16  | 9.1  |
|                     | BIRDS    |                    | 18          | 53  |     |     |     |     |     | 22  | 17  | 31  | 38  | 40  | 1.00 | 54  | 31.2 |
|                     | M_c      | Carnivores         | 10.5        | 12  |     |     |     |     |     | 14  | 0.0 | 6.9 | 25  | 10  | 0.86 | 20  | 11.1 |
|                     | M_gs     | Glirids -Sciurids  | 5.3         | 0.0 |     |     |     |     |     | 8.1 | 0.0 | 3.4 | 0   | 0.0 | 0.43 | 6   | 2.4  |
|                     | M_ha     | Hares              | 2.6         | 5.9 |     |     |     |     |     | 2.7 | 8.3 | 0.0 | 6.3 | 0.0 | 0.71 | 6   | 3.7  |
|                     | M_he     | Hedgehogs          | 2.6         | 0.0 |     |     |     |     |     | 16  | 0.0 | 6.9 | 25  | 0.0 | 0.57 | 13  | 7.2  |
|                     | M_u      | Ungulates          | 10.5        | 0.0 |     |     |     |     |     | 8.1 | 8.3 | 0.0 | 0   | 10  | 0.57 | 9   | 5.3  |
|                     | M_o      | Mammals other      | 5.3         | 2.9 |     |     |     |     |     | 2.7 | 17  | 6.9 | 0   | 10  | 0.86 | 9   | 6.4  |
|                     | MAMMALS  |                    | 36.8        | 21  |     |     |     |     |     | 51  | 33  | 24  | 56  | 30  | 1.00 | 63  | 36.1 |
|                     | R_sl     | Snakes & Lizards   | 2.6         | 2.9 |     |     |     |     |     | 0.0 | 33  | 21  | 0   | 0.0 | 0.57 | 12  | 8.5  |
|                     | R_t      | Tortoises          | 42.1        | 24  |     |     |     |     |     | 27  | 17  | 24  | 6.3 | 30  | 1.00 | 47  | 24.2 |
|                     | REPTILES |                    | 44.7        | 26  |     |     |     |     |     | 27  | 50  | 45  | 6.3 | 30  | 1.00 | 59  | 32.8 |
| N items             |          |                    | 38          | 34  |     |     |     |     | 37  | 12  | 29  | 16  | 10  |     |      | 176 |      |
| Levins              |          |                    | 4.6         | 5.4 |     |     |     |     | 6.9 | 5.1 | 7.1 | 5.3 | 4.5 |     |      |     |      |

**Table S3.** Percentage cover of the main habitat types and average canopy cover for the ridges occurring up to 6.5 km radius from the golden eagle nests in northern Greece.

| Territory               | Agriculture | Artificial |            | Scrub | Woods | Canopy cover |
|-------------------------|-------------|------------|------------|-------|-------|--------------|
|                         |             | Habitats   | Open Areas |       |       |              |
| Ridges at 6.5 km radius |             |            |            |       |       |              |
| 1                       | 2.32        | 0.04       | 12.80      | 0.00  | 84.83 | 43.46        |
| 2                       | 0.67        | 0.14       | 65.57      | 11.18 | 22.44 | 44.46        |
| 3                       | 2.28        | 0.09       | 2.56       | 12.85 | 82.23 | 58.63        |
| 4                       | 1.76        | 0.00       | 13.14      | 11.10 | 74.00 | 52.00        |
| 5                       | 6.93        | 0.00       | 26.89      | 28.40 | 37.77 | 37.52        |
| 6                       | 3.02        | 0.00       | 3.11       | 4.16  | 89.70 | 58.72        |
| 8                       | 1.77        | 0.92       | 18.09      | 51.89 | 27.33 | 48.21        |
| 9                       | 0.53        | 0.05       | 10.50      | 0.00  | 88.93 | 61.32        |
| 10                      | 12.96       | 0.01       | 3.39       | 30.33 | 53.30 | 54.32        |
| 11                      | 21.58       | 0.01       | 0.92       | 10.83 | 66.65 | 65.60        |
| 12                      | 12.33       | 1.25       | 40.28      | 40.88 | 5.25  | 37.56        |

**Table S4.** Incidence of wildfires in the regional units of our study territories in the period 1983-2008 [1]. 675 ha of territory 2 were burned again in 2020 [2].

| Regional Unit | N of golden eagle territories sampled | Average n wildfire incidents / average ha burned per year 1983-2008 |
|---------------|---------------------------------------|---------------------------------------------------------------------|
| Evros         | 7                                     | 50 / 571.5                                                          |
| Rodopi        | 2                                     | 8 / 190.9                                                           |
| Xanthi        | 1                                     | 11 / 107.9                                                          |
| Kavala        | 1                                     | 29 / 1947.1                                                         |
| Serres        | 1                                     | 8 / 190.9                                                           |
| Thessaloniki  | 3                                     | 18 / 840.8                                                          |

## References:

1. Tsagkari, K; Karetsos, G; Proutsos N. *Forest fires in Greece (1983-2008)* WWF – Greece / NAGREF / MFEI; 2011; 104 pp; available at <http://www.oikoskopio.gr/pyroskopio/pdfs/pyrkagies-ellada.pdf> 120.
2. National Observatory of Forest Fires. *Burned Areas Viewing Service tool*. Laboratory of Forest Management and Remote Sensing, Dept. of Forestry, Aristotle University of Thessaloniki. Available at <http://fmrsvm.for.auth.gr/> accessed 05/01/2022
